# Supplementary material for: Integrating and mining the chromatin landscape of cell-type specificity using self-organizing maps
Source: HighWire-hosted journal article supplement (doi:10.1101/gr.158261.113), 2013-10-29
Supplement: Supplemental_Legends.docx [file Supplemental_Legends.docx]

**Sup Figure S1. The difference between the stacked and concatenated training matrices for segmentation.**

**Sup Figure S2. Iterative Self-Organizing Map training.**

**Sup Figure S3. The toroid organization of the map.**

**Sup Figure S4. GM12878 signal enrichment for all GM12878 training sets.**

**Sup Figure S5. DNase I and H3K4me1 signal enrichment for each cell type.**

**Sup Figure S6. H3K4me2 and H3K4me3 signal enrichment for each cell type.**

**Sup Figure S7. H3K9ac and H3K27ac signal enrichment for each cell type.**

**Sup Figure S8. H3K27me3 and H3K36me3 signal enrichment for each cell type.**

**Sup Figure S9. H4K20me1 and CTCF signal enrichment for each cell type.**

**Sup Figure S10. RNA Pol II and background signal enrichment for each cell type.**

**Sup Figure S11. Mining the ENCODE SOM using the web interface. A.** Users can mine the hexunits on the SOM based on Training Data, TSS enrichments, GO terms, Other data, clusters, or chromosomal coordinates. Here the units enriched with genes annotated with the GO term “chromatin modification” are selected. Users can select to see the enriched genes. B. Another GO term, “ubiquitin dependent catabolic process” overlaps half of the units selected in A. C. selected units are away from the “dead zones” that have the highest nucleotide coverage. D-E. Separate subclusters with the same GO term can have very distinct enrichments in cell-type specific histone marks such as H4k20me1 for the units at the upper left corner of the map, and H3K36me3 for those in the lower left corner.

**Sup Figure S12. Overlay of additional, cell-type specific ChIP-seq and RNA-seq data reveals specificity of unit-level clusters.** ChIP-seq and RNA-seq datasets not used in the training show signal enrichment in specific sections of the map. **A.** K562
SPI1 (also known as PU.1) ChIP-seq data is enriched over the common TSS cluster, and in a second set of units (top right corner of green box) that have K562-specific CAGE enrichment (Fig 2E) **B.** GM12878 SPI1 does not show the common TSS cluster enrichment, and has a secondary cluster (top left corner of green box) that has GM-specific H3K4me2 enrichment. **C** GM12878 Pax5 is primarily associated with the common TSS cluster. D. GM12878 RNA-seq data overlaid on the map shows signal at both the common TSS cluster, as well as another region with high H3K36me3 signal that corresponds to downstream exons (Fig 3).

**Sup Figure S13. Metaclustering of the SOM as a function of inconsistency thresold. A.** The inconsistency coefficient is defined as the ratio of a given branch’s length compared to the average for branches below it down to a specified depth and branches with values above threshold are cut to form clusters. The number of clusters generally decreases gradually as a function of the threshold value. Several regions on the curve show a steep drop in cluster number followed by a plateau, indicating a robust cluster substructure. Arrows indicate visible drops that correspond to very different cluster numbers and are shown on the SOM for illustrative purposes. **B.** Comparison of meta-clusters mapped onto the SOM at various thresholds show how smaller substructures coalesce into larger ones at lower cluster numbers. Large clusters at threshold 3.5 reflect mark patterns associated with functional regions such as TSSs, protein coding genes, and repressed areas. These relatively large clusters often subdivide into regions that are cell-type specific when parsed into smaller clusters (see main text).

**Sup Figure S14. SOM Meta-clusters.** Location and unit cluster profile of each of the 150 meta-clusters from Figure 5.

**Sup Table S1. BED-formatted file of every genomic segment with hg19 coordinates and corresponding color-coded SOM unit assignment.**

**Sup Table S2. List of 29 datasets that left map structure essentially intact in leave-one-out SOMs.**

**Sup TableS3. Number of units with enriched GO terms.**
